# Supplementary material
Source: Royal Society of Chemistry journal article supplement (doi:10.1039/d5nj04998a)
Supplement: d5nj04998a1.pdf [file d5nj04998a1.pdf]

### Supplementary Information

#### “Visible-Light-Driven Photocatalytic Degradation of Ciprofloxacin and Cresol Red Dye with Simultaneous H<sub>2</sub>O<sub>2</sub> Generation Using a Co–Al LDH/g-C<sub>3</sub>N<sub>5</sub> Nanocomposite”

Alaka Rath<sup>1</sup>, Pratyush Kumar Sahu<sup>1</sup>, Vibhav Shukla<sup>2</sup>, Aslisha Champati<sup>1</sup>, Kafeel Ahmed Siddiqui<sup>2</sup>,  
Brundabana Naik<sup>1\*</sup>

1. Department of Chemistry, ITER, Siksha O' Anusandhan, deemed to be University, Bhubaneswar, Odisha, India
2. Department of Chemistry, National Institute of Technology Raipur, G E Road Raipur, 492010 Chhattisgarh, India

\*Corresponding Author: [brundabananaik@soa.ac.in](mailto:brundabananaik@soa.ac.in)

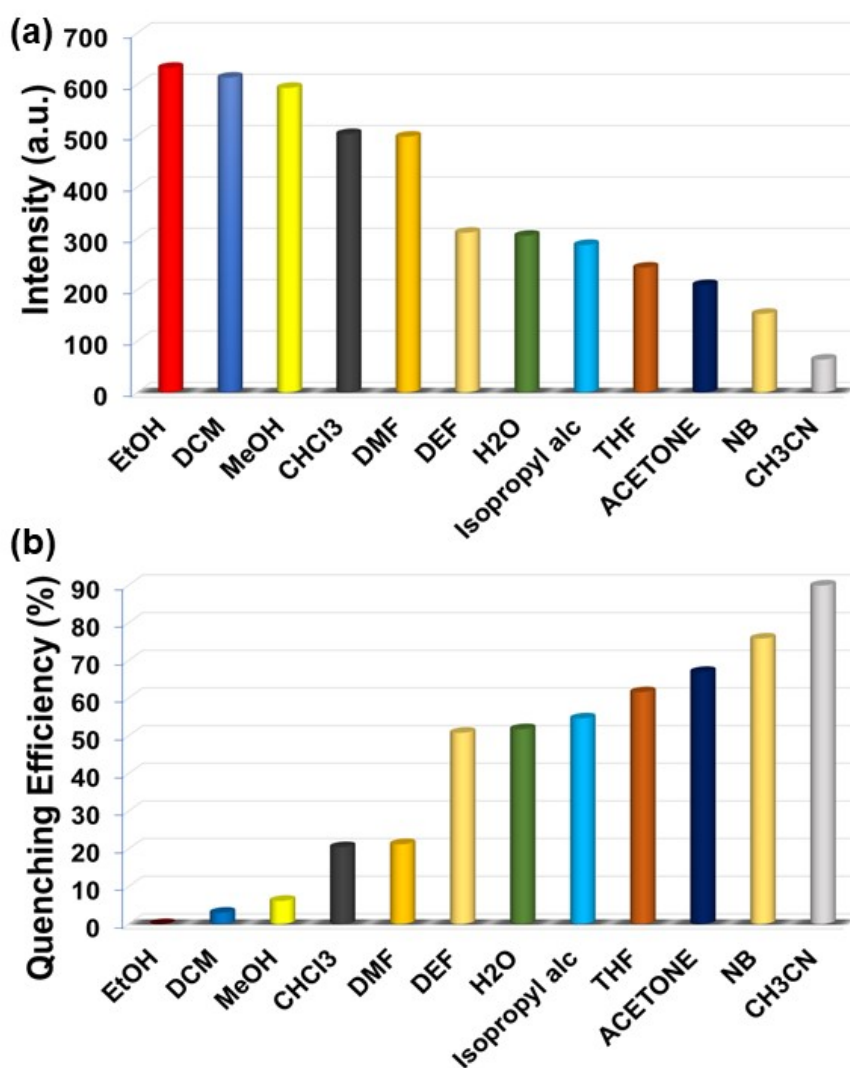

**Fig. S1** (a) Fluorescence intensity measurements of Co-Al LDH in different solvent solutions, and (b) Comparative quenching efficiencies of Co-Al LDH in solvent solution.

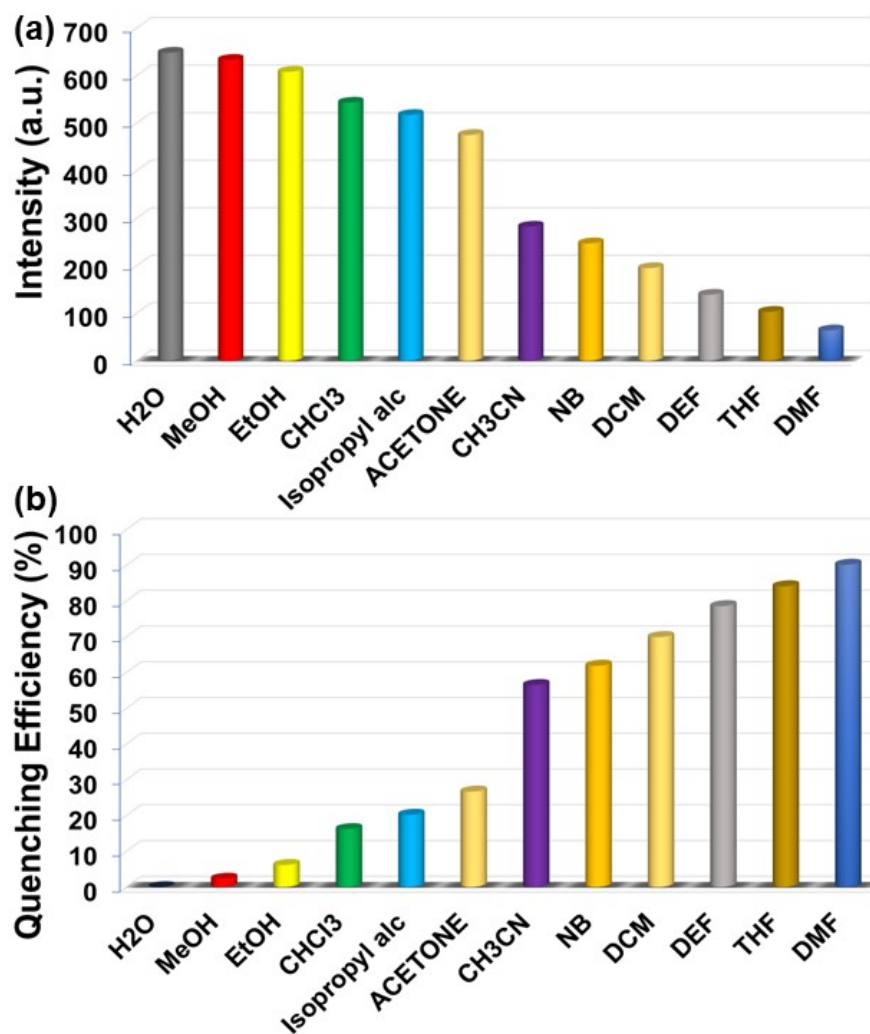

**Fig. S2** (a) Fluorescence intensity measurements of g-C<sub>3</sub>N<sub>5</sub> in different solvent solutions; and (b) Comparative quenching efficiencies of g-C<sub>3</sub>N<sub>5</sub> in solvent solution.

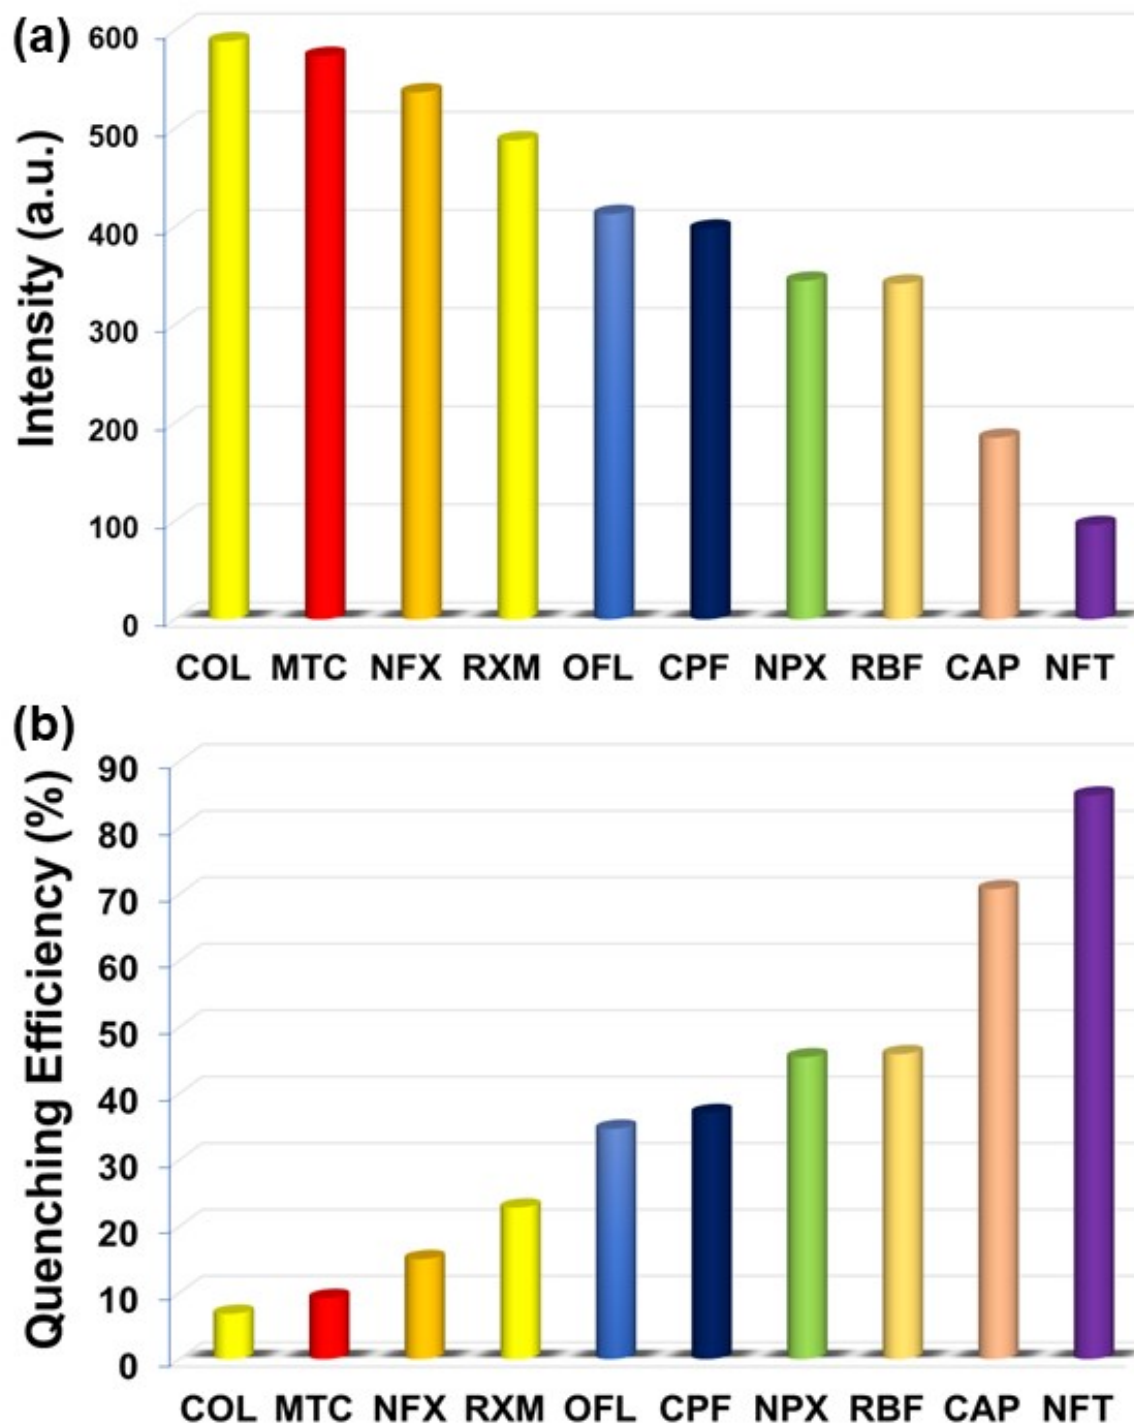

**Fig. S3** (a) Fluorescence intensity measurements of Co-Al LDH in different antibiotic solutions; and (b) Comparative quenching efficiencies of Co-Al LDH in solvent solution with specific antibiotics.

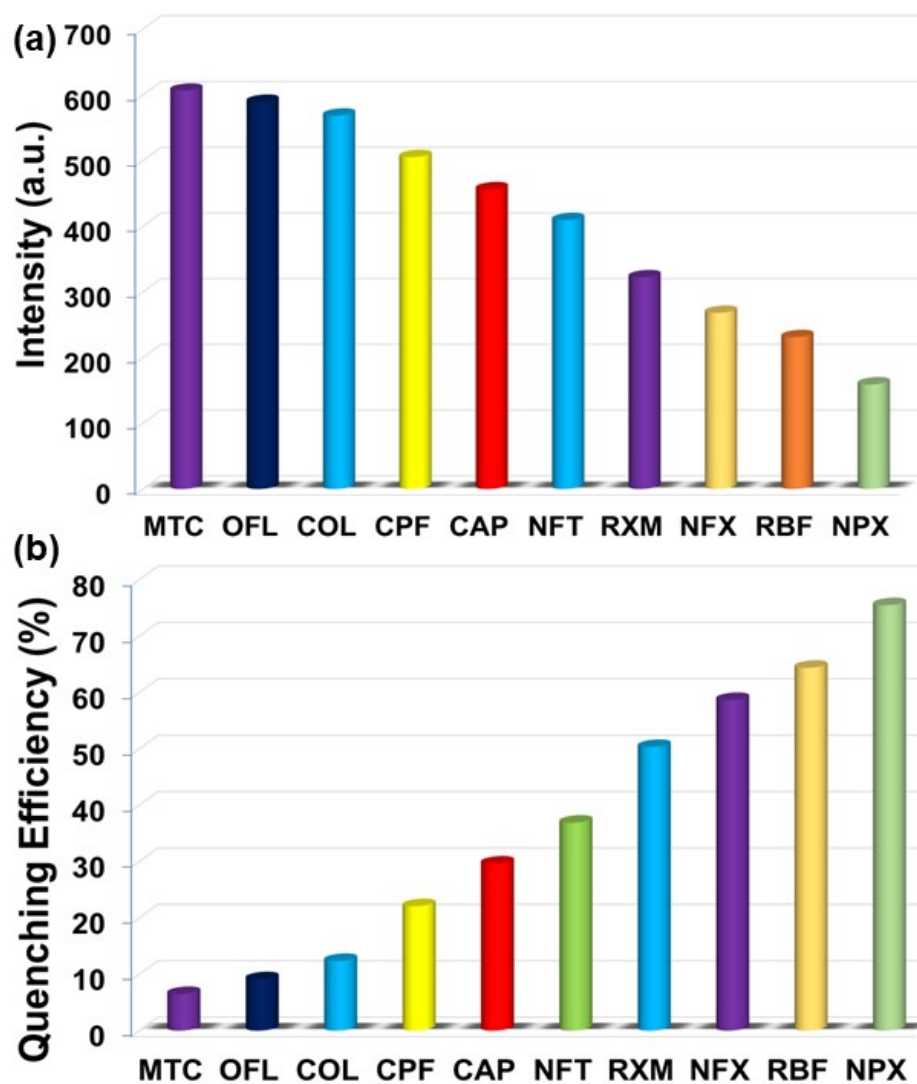

**Fig. S4** (a) Fluorescence intensity measurements of g-C<sub>3</sub>N<sub>5</sub> in different antibiotic solutions; and (b) Comparative quenching efficiencies of g-C<sub>3</sub>N<sub>5</sub> in solvent solution with specific antibiotics.

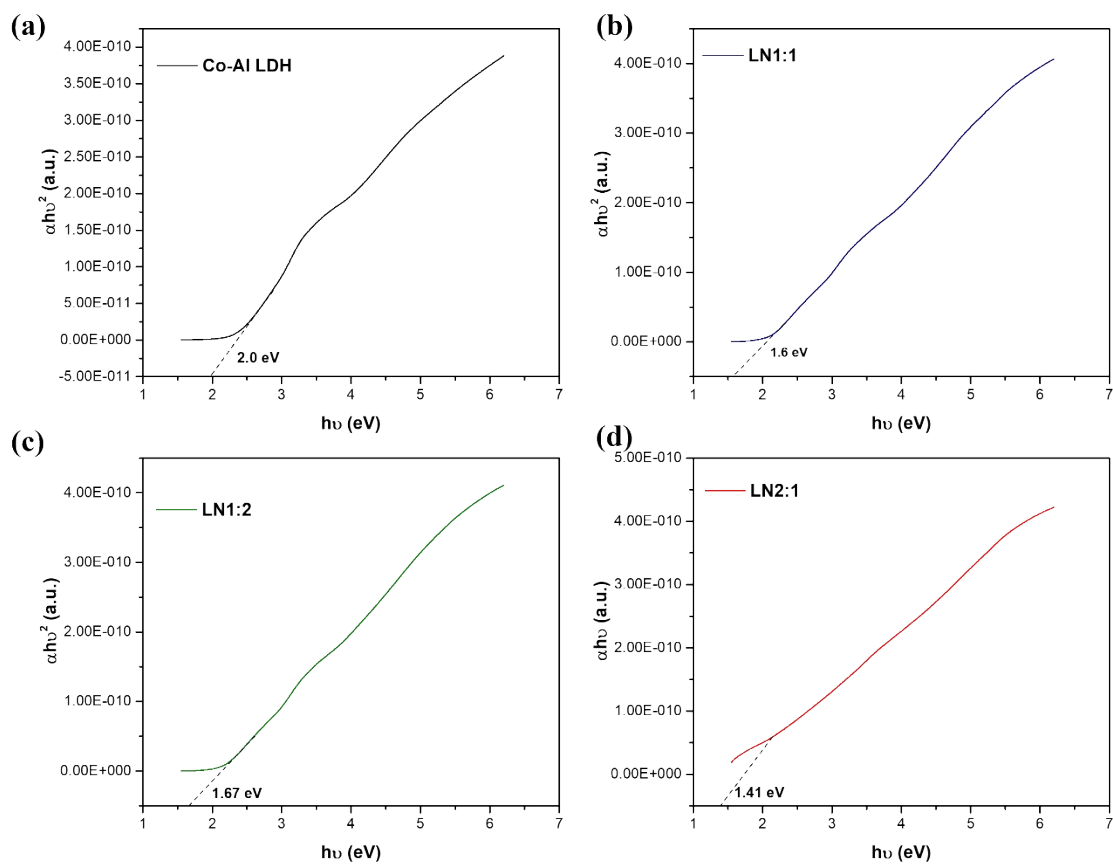

**Fig. S5** Tauc plots for bandgap estimation of (a) Co-Al LDH (b) LN1:1 (c) LN1:2 and (d) LN2:1

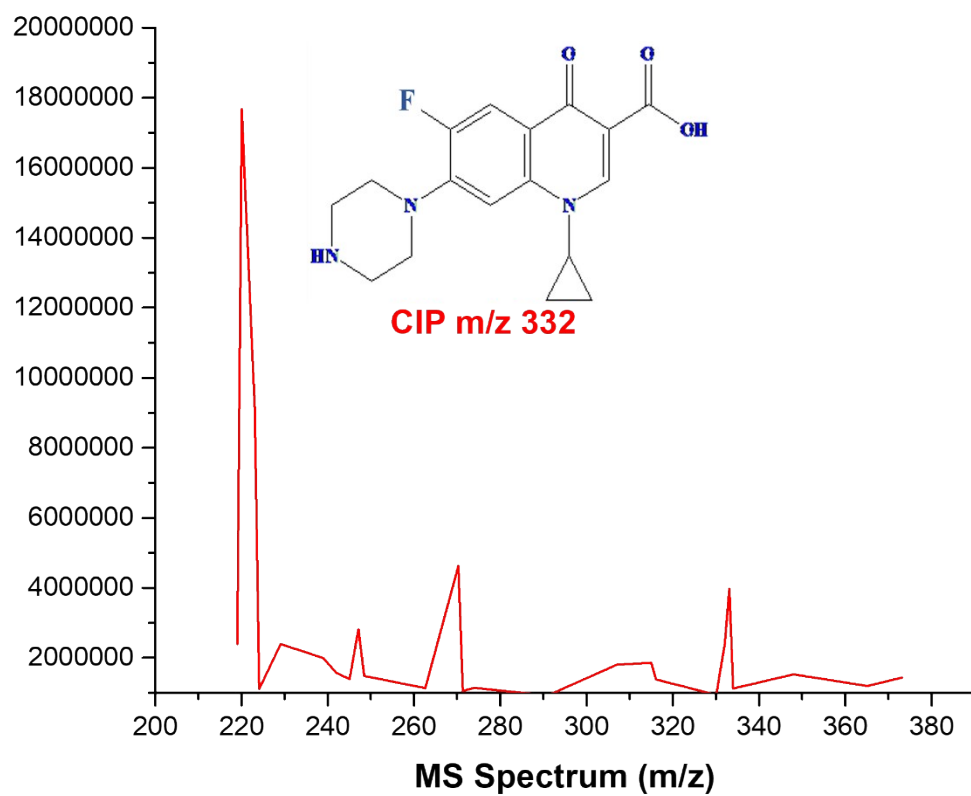

**Fig.S6** LC-MS analysis of ciprofloxacin over LN2:1 composite after 120 mins of photodegradation
